# Supplementary material for: DKK3 ameliorates neuropathic pain via inhibiting ASK-1/JNK/p-38-mediated microglia polarization and neuroinflammation
Source: PubMed Central journal article supplement (PMC9164405; doi:10.1186/s12974-022-02495-x), 2022-06-03

**(a)**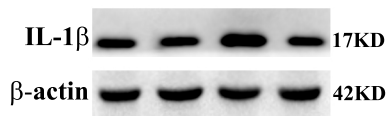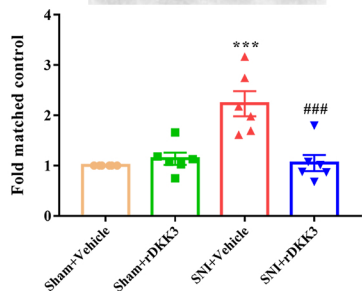**(b)**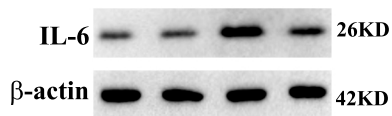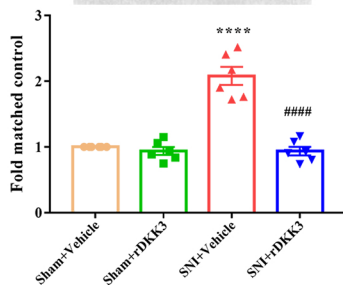**(c)**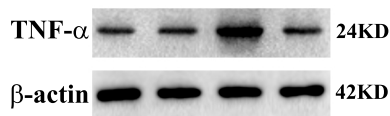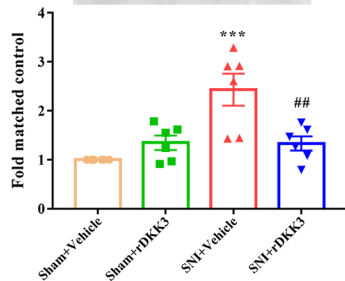**(d)**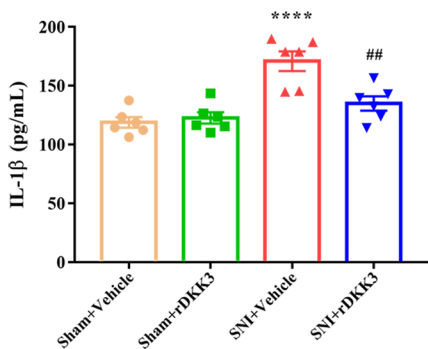**(e)**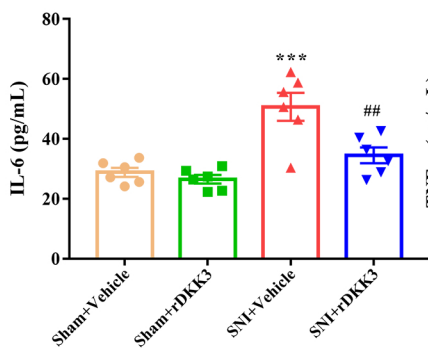**(f)**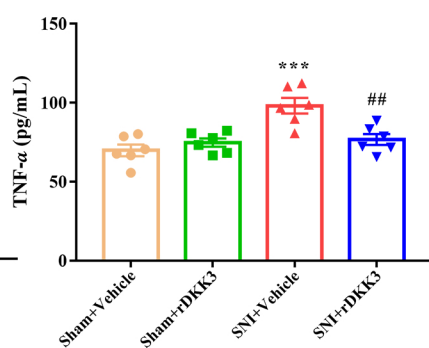

Supplement: 12974_2022_2495_MOESM3_ESM.pdf [file 12974_2022_2495_MOESM3_ESM.pdf]
