# Supplementary material for: DKK3 ameliorates neuropathic pain via inhibiting ASK-1/JNK/p-38-mediated microglia polarization and neuroinflammation
Source: Springer Nature journal article supplement (doi:10.1186/s12974-022-02495-x), 2022-06-03

**(a)**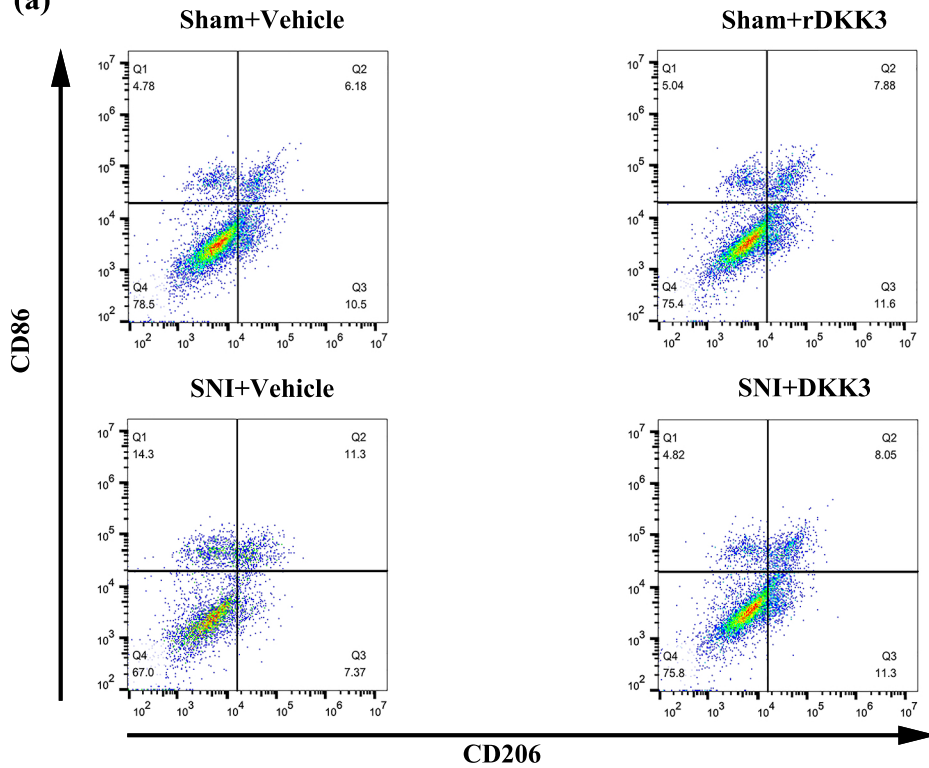**(b)**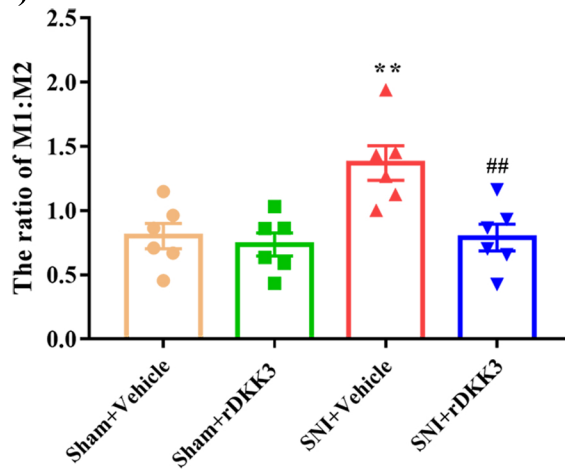

Supplement: MOESM2 [file 23125422]
