# Supplementary material for: DKK3 ameliorates neuropathic pain via inhibiting ASK-1/JNK/p-38-mediated microglia polarization and neuroinflammation
Source: Springer Nature journal article supplement (doi:10.1186/s12974-022-02495-x), 2022-06-03

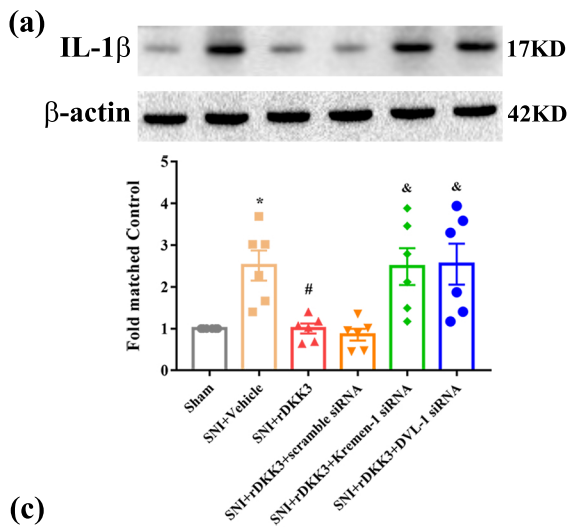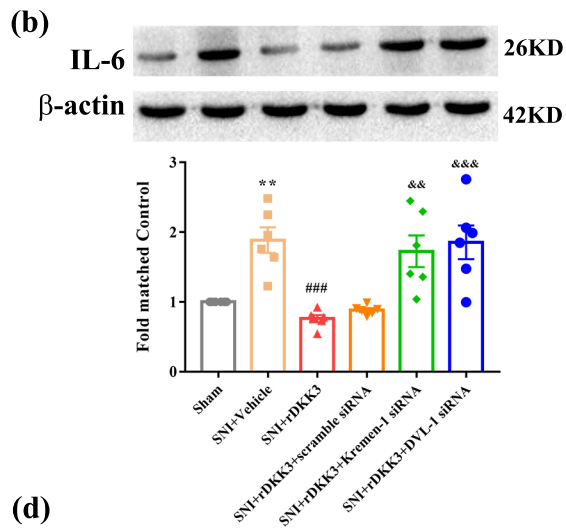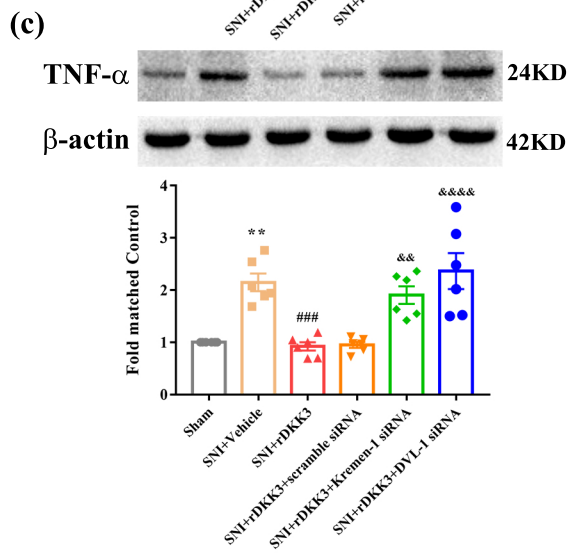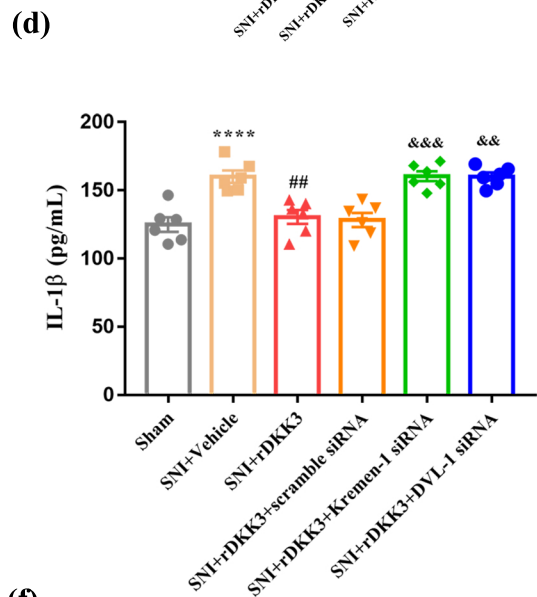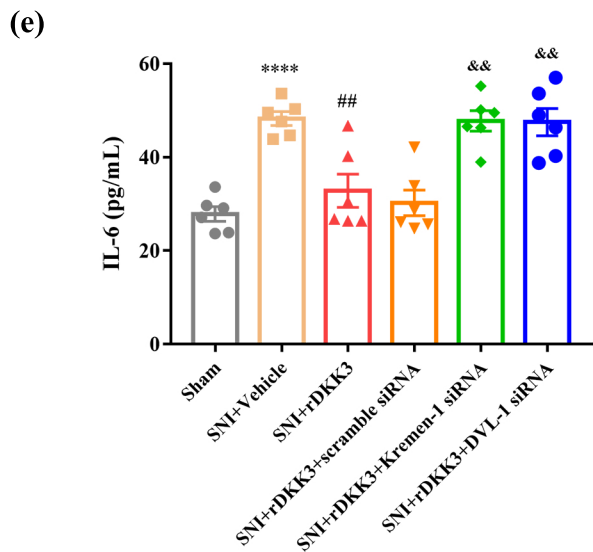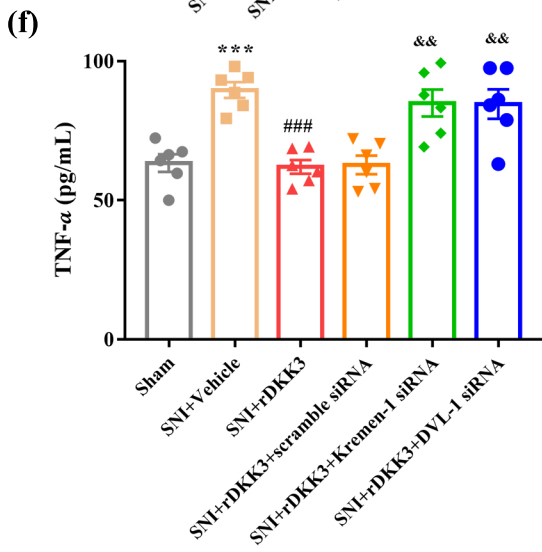

Supplement: MOESM5 [file 23125422]
